# Supplementary material
Source: MDPI journal article supplement (https://www.mdpi.com/1999-4907/10/3/227)
Supplement: s1 [file s1]

**Table S1:** List of tree species planted by farmers in each group identified: farmers who fence their plots, assisted by the association tiipaalga (Group 1), farmers who do not fence their plots, located in the same municipality of action of tiipaalga (Group 2) and farmers who do not fence their plots, located in different municipality from those where tiipaalga is active (Group 3). (*) Tree species with an asterisk are exotic, those in bold are among the 15 most planted tree species and those in italics are species planted only by one of the farmers group. (**) Tree species whose scientific name could not be determined are reported with their local name.

| **Group 1** | **Group 2** | **Group 3** |
| --- | --- | --- |
| *Acacia ataxacantha* DC. | *Acacia macrostachya* Rchb. | *Acacia macrostachya* Rchb. |
| *Acacia macrostachya* Rchb. | ***Acacia nilotica* Willd.** | ***Acacia nilotica* Willd.** |
| ***Acacia nilotica* Willd.** | ***Acacia senegal* Willd.** | ***Acacia senegal* Willd.** |
| ***Acacia senegal* Willd.** | ***Adansonia digitata* L.** | ***Adansonia digitata* L.** |
| ***Adansonia digitata* L.** | *Afzelia africana* Pers. | *Afzelia africana* Pers. |
| *Afzelia africana* Pers. | ***Anacardium occidentale* L. *** | ***Azadirachta indica* A.Juss.** |
| *Albizia lebbeck* Benth. * | ***Azadirachta indica* A.Juss. *** | *Bauhinia rufescens* Lam. |
| ***Anacardium occidentale* L. *** | *Bombax costatum* Pellegrin & Vuillet | *Balanites aegyptica* Wall. |
| ***Azadirachta indica* A.Juss. *** | *Carica papaya* L. * | *Bombax costatum* Pellegrin & Vuillet |
| *Baissea multiflora* A. DC. | *Cassia sieberiana* DC. | *Carica papaya* L |
| batam ** | *Ceiba pentandra* Gaertn *. | *Cassia sieberiana* DC |
| *Bombax costatum* Pellegrin & Vuillet | *Cissus quadrangularis* L. * | ***Citrus limon* Burm. fil. *** |
| *Boswellia dalzielii* Hutchinson | ***Citrus limon* Burm. fil. *** | ***Eucalyptus camaldulensis* Dehnh. *** |
| *Ceiba pentandra* Gaertn.* | *Delonix regia.* Raf. * | *Ficus sur* Forssk. |
| ***Citrus limon* Burm. fil. *** | *Detarium microcarpum* Guill. & Perr. | ***Jatropha curcas* L. *** |
| *Citrus tangelo* Ingram & Moore * | *Diospyros mespiliformis* Hochst. | *Khaya senegalensis* A. Juss. |
| *Combretum micranthum* G. Don | ***Eucalyptus camaldulensis* Dehnh. *** | *Lannea microcarpa* Engl. & K. Krause |
| *Commiphora africana* Engl. | *Faidherbia albida* A. Chev. | ***Mangifera indica* Bl. *** |
| *Crateva adansonii* Jacobs | *Ficus sur* Forssk. | ***Moringa oleifera* Lam. *** |
| *Detarium microcarpum* Guill. & Perr. | ***Jatropha curcas* L. *** | ***Parkia biglobosa* Jacq.** |
| *Diospyros mespiliformis* Hochst. | *Khaya senegalensis* A. Juss. | *Prosopis africana* Taub. |
| *Elaeis guineensis* Jacq. * | *Lannea microcarpa* Engl. & K. Krause | ***Psidium guajava* L. *** |
| ***Eucalyptus camaldulensis* Dehnh. *** | ***Mangifera indica* Bl. *** | ***Saba senegalensis* Pichon** |
| *Euphorbia pulcherrima* Willd.* | ***Moringa oleifera* Lam. *** | *Securidaca longepedunculata* Fres. |
| *Faidherbia albida* A. Chev. | *Mitragyna inermis* Willd. | *Tamarindus indica* L. |
| *Ficus platyphylla* Del. | ***Parkia biglobosa* Jacq.** | ***Vitellaria paradoxa* Gaertn.** |
| *Ficus sur* Forssk. | *Prosopis africana* Taub. | *Ziziphus mauritania* Lam. * |
| *Gliricidia sepium* Jacq. * | ***Psidium guajava* L.*** |  |
| *Gmelina arborea* Roxb. * | *Pterocarpus erinaceus* Poir. |  |
| ***Jatropha curcas* L. *** | ***Saba senegalensis* Pichon** |  |
| *Khaya senegalensis* A. Juss. | *Sarcocephalus latifolius* E. A. Bruce |  |
| *Lannea microcarpa* Engl. & K. Krause | *Securidaca longepedunculata* Fres. |  |
| *Lawsonia inermis* L. * | *Tamarindus indica* L. |  |
| *Maerua angolensis* L.E. Kers | ***Vitellaria paradoxa* Gaertn.** |  |
| ***Mangifera indica* Bl. *** | *Ziziphus mauritania* Lam. * |  |
| ***Moringa oleifera* Lam. *** |  |  |
| Nassadouaga** |  |  |
| *Nauclea latifolia* Sm. |  |  |
| *Opilia amentacea* Roxb. |  |  |
| ***Parkia biglobosa* Jacq.** |  |  |
| Peka ** |  |  |
| *Persea americana* Mill.* |  |  |
| ***Psidium guajava* L. *** |  |  |
| ***Saba senegalensis* Pichon** |  |  |
| *Sarcocephalus latifolius* E. A. Bruce |  |  |
| *Sansevieria senegambica* Baker |  |  |
| Sassanwoungu ** |  |  |
| *Sclerocarya birrea* Kokwaro. |  |  |
| *Securidaca longepedunculata* Fres. |  |  |
| *Tamarindus indica* L. |  |  |
| Tintiniga ** |  |  |
| *Vernonia colorata* Drake * |  |  |
| ***Vitellaria paradoxa* Gaertn.** |  |  |
| *Ziziphus mauritania* Lam. * |  |  |

**Table S2.** Proportions of farmers from each of the three farmers groups identified, reporting a specific set of issues affecting their tree plantations practices.

| **Factors** | **Total (%)** | **Group 1 (%)** | **Group 2 (%)** | **Group 3 (%)** |
| --- | --- | --- | --- | --- |
| Limitations in access to water | 88 | 90 | 83 | 87 |
| Limitations in access to seeds | 69 | 66 | 65 | 78 |
| Grazing animals | 44 | 24 | 39 | 91 |
| Damages by termites | 42 | 32 | 30 | 74 |
| Limited capacity to invest financial resources | 21 | 16 | 35 | 17 |
| Wildfire | 15 | 16 | 13 | 13 |
| Lack of capacity building opportunities | 13 | 8 | 4 | 30 |
| Lack of land | 8 | 4 | 22 | 4 |
| Lack of nurseries materials | 7 | 10 | 4 | 4 |
| Soil fertility | 6 | 8 | 4 | 4 |
| Limited labour available | 6 | 6 | 13 | 0 |
| Lack of technical knowledge | 2 | 2 | 0 | 4 |
| Low survival rates of tree seedlings | 2 | 0 | 9 | 0 |
| Illegal fuelwood cutting | 1 | 2 | 0 | 0 |
